# Supplementary material for: Parallel evolutionary paths to produce more than one Pseudomonas aeruginosa biofilm phenotype
Source: PubMed Central journal article supplement (PMC6954232; doi:10.1038/s41522-019-0113-6), 2020-01-10
Supplement: 41522_2019_113_MOESM1_ESM.pdf [file 41522_2019_113_MOESM1_ESM.pdf]

## Supplementary Information

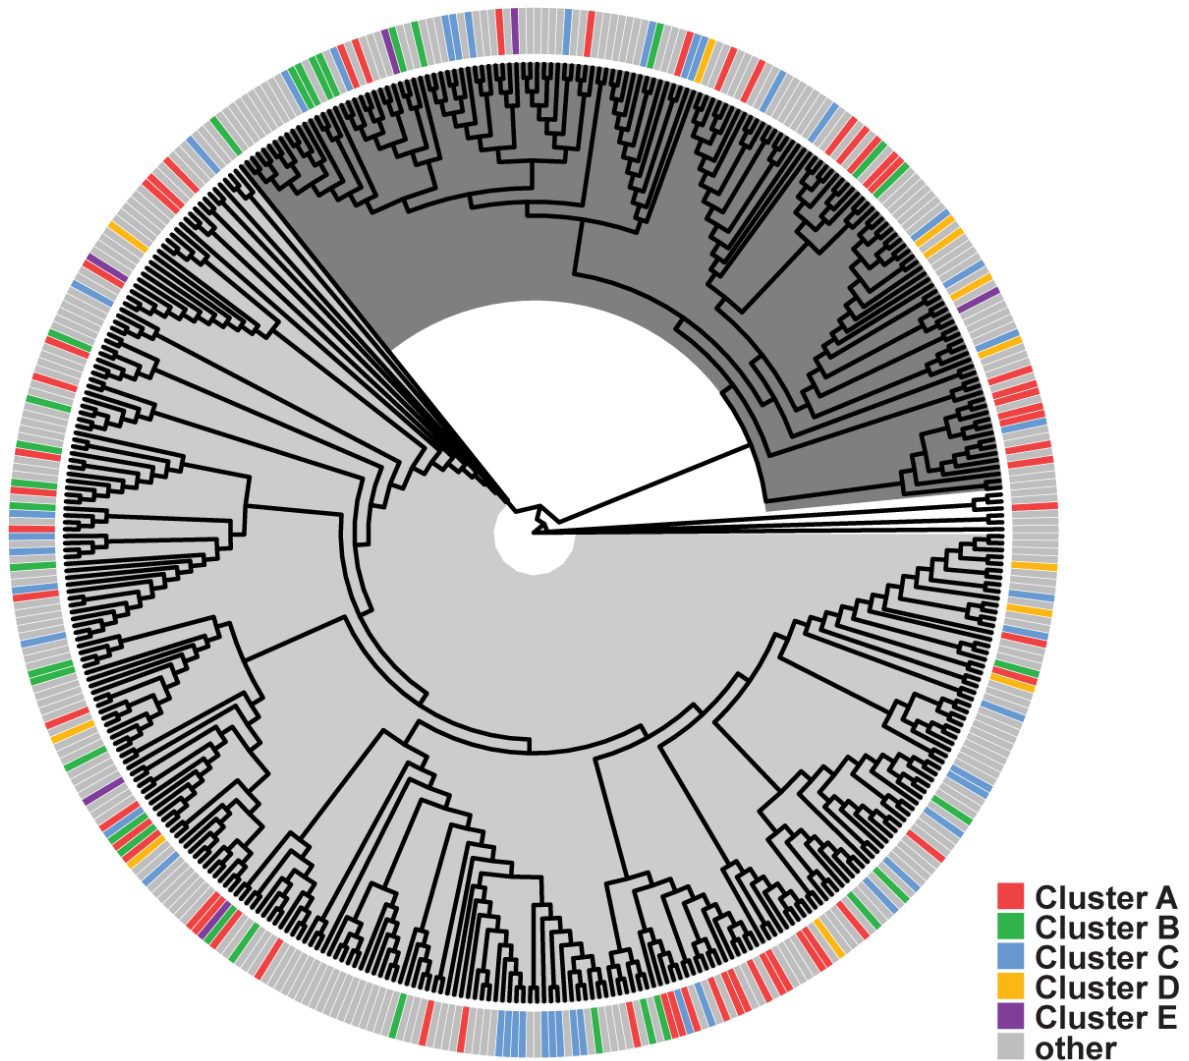

**Supplementary Figure 1: The biofilm phenotype is independent of the genetic background and structurally related strains are distributed across the entire phylogenetic tree of 414 clinical *P. aeruginosa* isolates.**

The phylogenetic tree is based on 3,524 genes that are present in the DNA sequences of 414 clinical isolates and 5 reference strains (PA14, PAO1, PA7, LESB58, PACS2). The proportion of PAO1-like strains is highlighted in light gray; PA14-like strains are highlighted in dark gray. The color code represents the assignment to a specific biofilm cluster: red – cluster A; green – cluster B; blue – cluster C; yellow – cluster D; purple – cluster E; gray – unassigned/others.

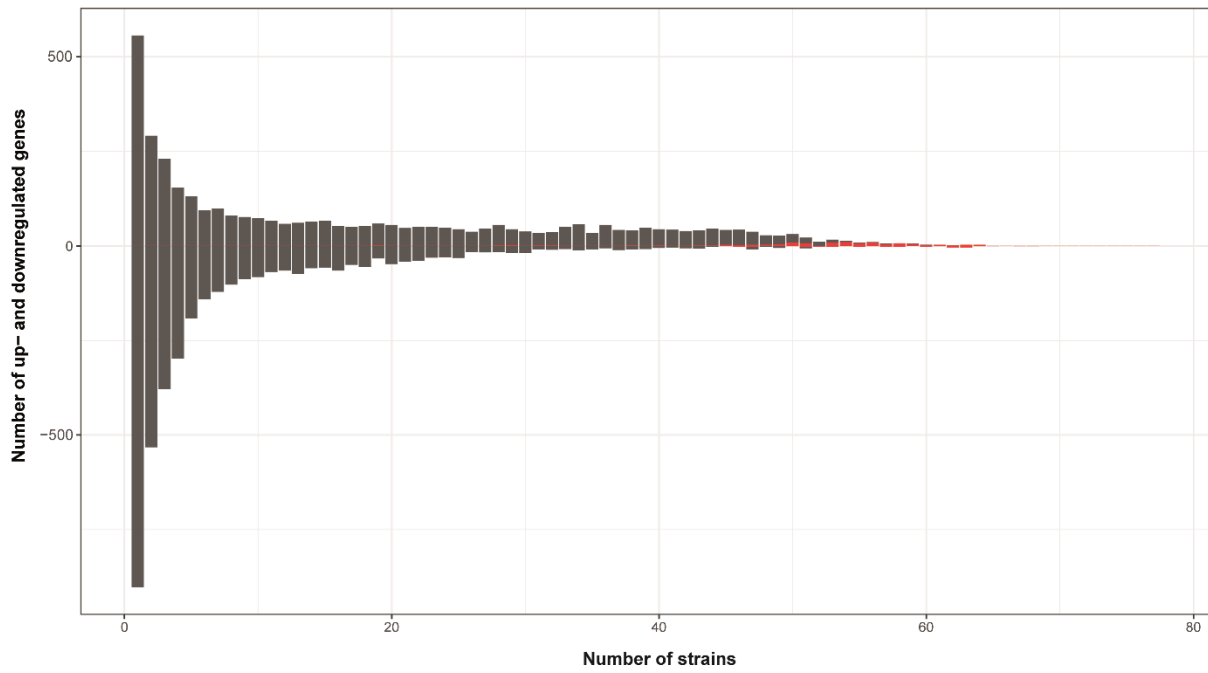

**Supplementary Figure 2: Numbers of differentially expressed genes (biofilm vs. planktonic) that are commonly regulated among the tested strains.**

A large number of genes are differentially regulated in only a few clinical isolates ( $\leq 6$  strains), whereas genes of the biofilm core transcriptome (highlighted in red) are mostly shared among a large number of clinical isolates ( $\geq 45$  strains).

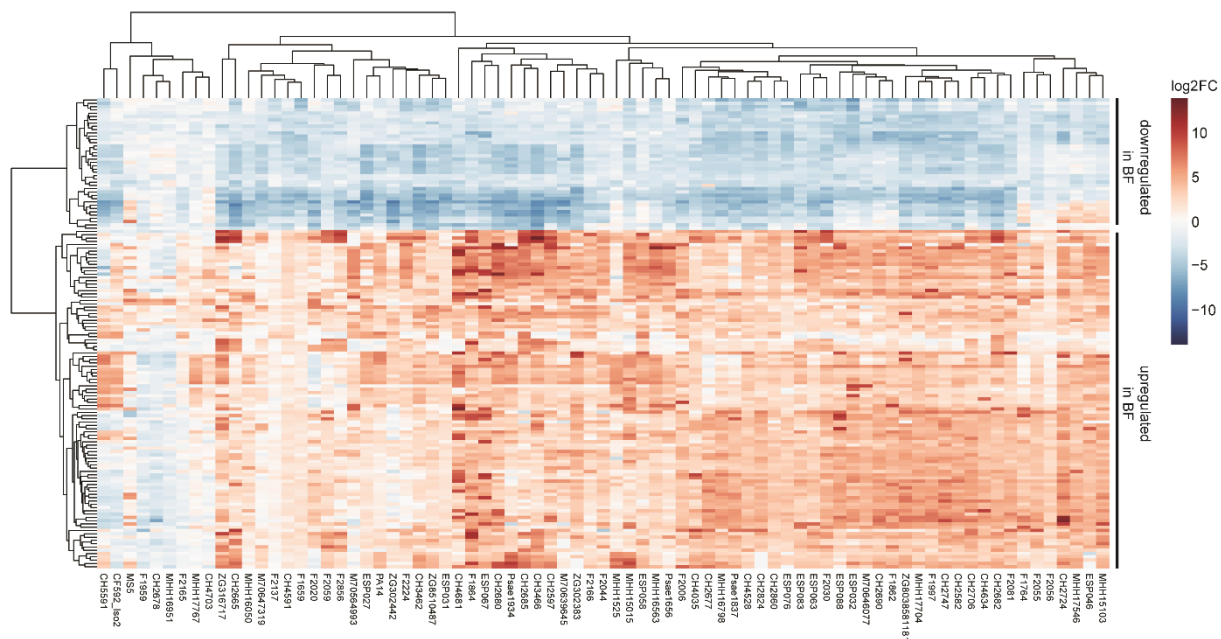

**Supplementary Figure 3: Identified genes of the biofilm core transcriptome show a distinct expression pattern in an array of clinical isolates.**

Individual expression values (log<sub>2</sub>-fold changes between biofilm [BF] and planktonic growth) of 143 genes belonging to the core biofilm transcriptome (upregulated in BF: 103 genes; downregulated in BF: 40 genes) are displayed for 77 strains in biofilm conditions compared to planktonic growth.

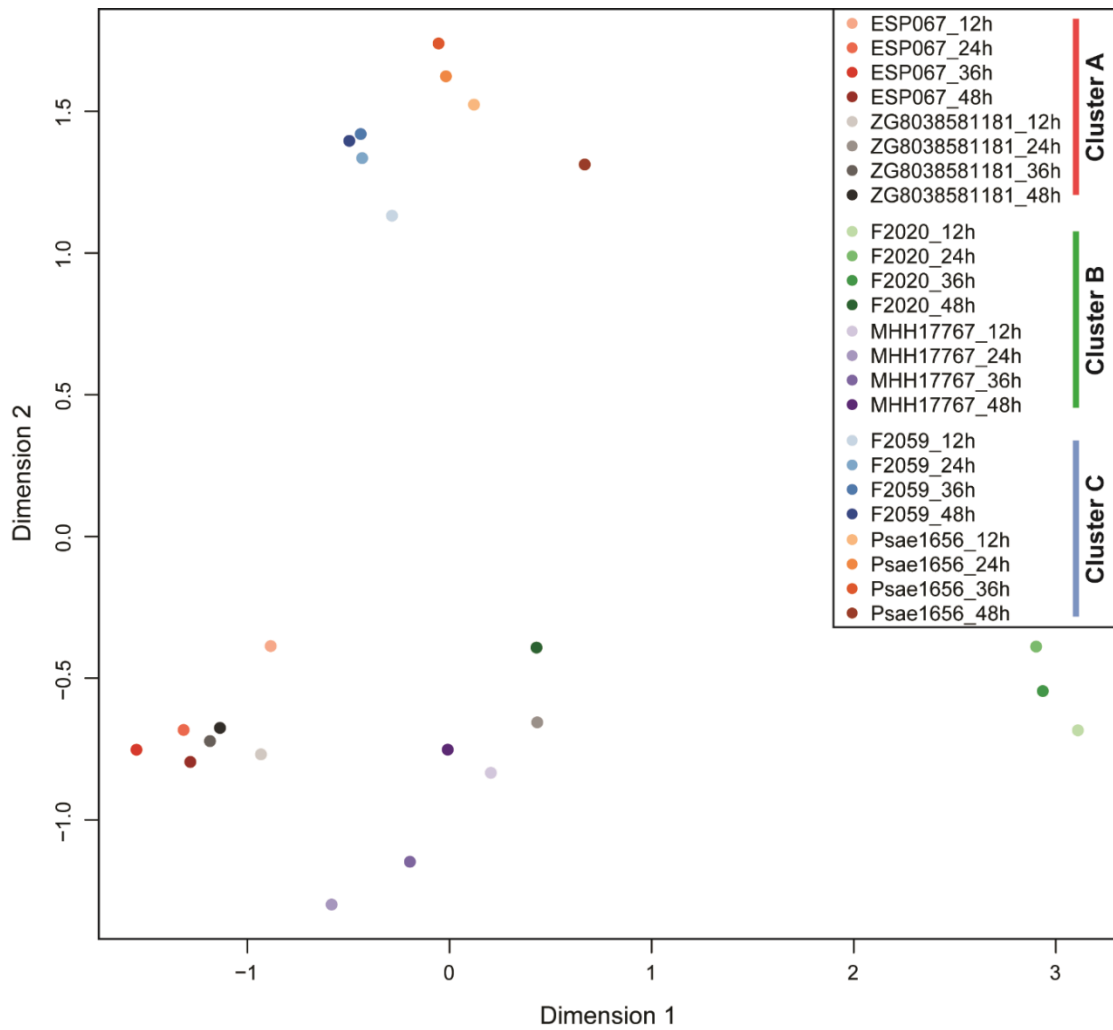

**Supplementary Figure 4: Transcriptional profiles of biofilm samples over time.**

The multidimensional scaling plot (MDS) of transcriptional profiles of six selected clinical isolates (two strains per each of the three biofilm clusters) reveals rather conserved profiles over time (12 h, 24 h, 36 h, and 48 h of biofilm growth), indicating that the maturation status of the biofilm has minor influence on transcriptional signatures under biofilm growth conditions. Each dot represents one clinical isolate under a certain biofilm condition.



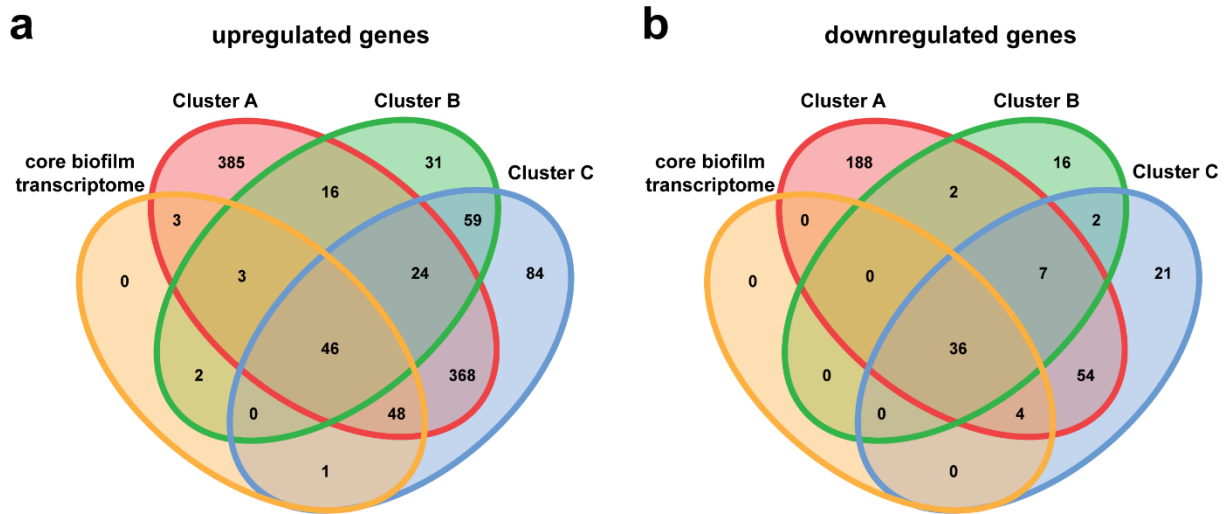

**Supplementary Figure 6: Overlap of differentially expressed genes between the biofilm core and the three structurally distinct biofilm clusters.**

**a.** Genes, which are specifically upregulated under biofilm growth conditions (threshold  $\log_2FC \geq 2$  with  $FDR < 0.05$ ), share a large overlap between the core biofilm transcriptome (orange) and cluster A (red) and cluster C (blue), whereas in cluster B (green) only approximately half of the regulated genes are also included in the core biofilm transcriptome. **b.** Genes, which are specifically downregulated under biofilm growth conditions (threshold  $\log_2FC \leq -2$ ;  $FDR < 0.05$ ), are largely shared between the core biofilm transcriptome and the three biofilm clusters.

**Supplementary Table 1: Clinical isolates and the reference strain PA14 used for RNA-sequencing and phenotypic characterization**

Strains used in this study are listed including a unique identifier (“Isolate name”), and available information about the geographic origin and sampling site. Clinical isolates that were assigned to one of the five identified biofilm clusters are labeled with the respective letter. The top 33 strains were used for extensive phenotypic characterization. CF – cystic fibrosis; nd – not determined.

| BF cluster                   | Isolate name | Clinic / geographic origin | Sampling site                         |                       |
|------------------------------|--------------|----------------------------|---------------------------------------|-----------------------|
| Phenotypically characterized | A            | CH2860                     | Charité Berlin                        | respiratory tract     |
|                              | A            | CH4528                     | Charité Berlin                        | respiratory tract     |
|                              | A            | ESP046                     | Palma de Mallorca, Spain <sup>#</sup> | nd/other              |
|                              | A            | ESP067                     | Palma de Mallorca, Spain <sup>#</sup> | nd/other              |
|                              | A            | ESP088                     | Palma de Mallorca, Spain <sup>#</sup> | nd/other              |
|                              | A            | F2030                      | University hospital Frankfurt         | respiratory tract     |
|                              | A            | F2137                      | University hospital Frankfurt         | wound                 |
|                              | A            | MHH16798                   | Hannover Medical School               | respiratory tract     |
|                              | A            | MHH17704                   | Hannover Medical School               | nd/other              |
|                              | A            | ZG302383                   | Görlitz                               | nd/other              |
|                              | A            | ZG8038581181               | Chemnitz                              | respiratory tract     |
|                              | B            | CH2682                     | Charité Berlin                        | rectal swab           |
|                              | B            | ESP027                     | Palma de Mallorca, Spain <sup>#</sup> | nd/other              |
|                              | B            | F1959                      | University hospital Frankfurt         | respiratory tract, CF |
|                              | B            | F2020                      | University hospital Frankfurt         | wound                 |
|                              | B            | F2165                      | University hospital Frankfurt         | respiratory tract     |
|                              | B            | F2166                      | University hospital Frankfurt         | respiratory tract     |
|                              | B            | F2224                      | University hospital Frankfurt         | nd/other              |
|                              | B            | MHH16050                   | Hannover Medical School               | nd/other              |
|                              | B            | MHH16563                   | Hannover Medical School               | respiratory tract, CF |
|                              | B            | MHH17767                   | Hannover Medical School               | respiratory tract, CF |
|                              | C            | CH2706                     | Charité Berlin                        | rectal swab           |
|                              | C            | CH4591                     | Charité Berlin                        | rectal swab           |
|                              | C            | CH4634                     | Charité Berlin                        | nd/other              |
|                              | C            | ESP063                     | Palma de Mallorca, Spain <sup>#</sup> | nd/other              |
|                              | C            | ESP083                     | Palma de Mallorca, Spain <sup>#</sup> | nd/other              |
|                              | C            | F1864                      | University hospital Frankfurt         | nd/other              |
|                              | C            | F2006                      | University hospital Frankfurt         | wound                 |
|                              | C            | F2059                      | University hospital Frankfurt         | wound                 |
|                              | C            | F2856                      | University hospital Frankfurt         | nd/other              |
|                              | C            | Psae1656                   | Munich*                               | respiratory tract     |
|                              | C            | ZG316717                   | Görlitz                               | ear                   |
|                              | C            | ZG8510487                  | Leipzig                               | urinary tract         |
|                              | PA14         | Reference strain           | burn wound                            |                       |
| C                            | CF592_Iso2   | University hospital Essen  | respiratory tract, CF                 |                       |
|                              | CH2582       | Charité Berlin             | nd/other                              |                       |
|                              | CH2597       | Charité Berlin             | wound                                 |                       |

|   |           |                                       |                       |
|---|-----------|---------------------------------------|-----------------------|
|   | CH2665    | Charité Berlin                        | respiratory tract     |
|   | CH2677    | Charité Berlin                        | urinary tract         |
|   | CH2678    | Charité Berlin                        | respiratory tract, CF |
|   | CH2680    | Charité Berlin                        | nd/other              |
|   | CH2685    | Charité Berlin                        | rectal swab           |
| A | CH2690    | Charité Berlin                        | rectal swab           |
| A | CH2724    | Charité Berlin                        | nd/other              |
|   | CH2747    | Charité Berlin                        | respiratory tract     |
|   | CH2824    | Charité Berlin                        | respiratory tract     |
|   | CH3462    | Charité Berlin                        | rectal swab           |
|   | CH3466    | Charité Berlin                        | sepsis                |
|   | CH4035    | Charité Berlin                        | respiratory tract     |
| B | CH4681    | Charité Berlin                        | respiratory tract     |
|   | CH4703    | Charité Berlin                        | nd/other              |
|   | CH5591    | Charité Berlin                        | rectal swab           |
|   | ESP031    | Palma de Mallorca, Spain <sup>#</sup> | nd/other              |
|   | ESP032    | Palma de Mallorca, Spain <sup>#</sup> | nd/other              |
|   | ESP058    | Palma de Mallorca, Spain <sup>#</sup> | nd/other              |
|   | ESP076    | Palma de Mallorca, Spain <sup>#</sup> | nd/other              |
| C | F1659     | University hospital Frankfurt         | respiratory tract     |
| B | F1764     | University hospital Frankfurt         | respiratory tract     |
| C | F1862     | University hospital Frankfurt         | respiratory tract     |
| A | F1997     | University hospital Frankfurt         | rectal swab           |
|   | F2044     | University hospital Frankfurt         | respiratory tract     |
|   | F2055     | University hospital Frankfurt         | urinary tract         |
| C | F2056     | University hospital Frankfurt         | wound                 |
|   | F2081     | University hospital Frankfurt         | rectal swab           |
| B | M70564993 | University hospital Münster           | respiratory tract     |
|   | M70639645 | University hospital Münster           | urinary tract         |
| A | M70646077 | University hospital Münster           | rectal swab           |
| B | M70647319 | University hospital Münster           | respiratory tract, CF |
|   | MHH15015  | Hannover Medical School               | respiratory tract     |
|   | MHH15103  | Hannover Medical School               | wound                 |
| B | MHH1525   | Hannover Medical School               | respiratory tract, CF |
|   | MHH16951  | Hannover Medical School               | respiratory tract, CF |
|   | MHH17546  | Hannover Medical School               | respiratory tract, CF |
|   | MS5       | University hospital Münster           | nd/other              |
|   | Psae1837  | Gera*                                 | nd/other              |
| A | Psae1934  | Bremen*                               | respiratory tract     |
|   | ZG302442  | Görlitz                               | ear                   |

<sup>#</sup> provided by a Spanish strain collection located at Son Espases University hospital in Palma de Mallorca, Spain

\* provided by a strain collection located at University Hospital Freiburg



### Supplementary Table 2: Expression of *phz* genes

Cluster-wise comparison of the expression of *phz* genes in biofilm (BF), or planktonic (PL) growth conditions. Significant changes (FDR < 0.05) are depicted in black; log<sub>2</sub>-fold changes (log<sub>2</sub>FC) above or below the threshold (±1.5) are displayed in bold.

| PA14 locus tag | Gene         | biofilm growth      |       |                     |       |                     |       | planktonic growth   |              |                     |              |                     |       |
|----------------|--------------|---------------------|-------|---------------------|-------|---------------------|-------|---------------------|--------------|---------------------|--------------|---------------------|-------|
|                |              | A vs. B             |       | A vs. C             |       | B vs. C             |       | A vs. B             |              | A vs. C             |              | B vs. C             |       |
|                |              | log <sub>2</sub> FC | FDR   | log <sub>2</sub> FC | FDR   | log <sub>2</sub> FC | FDR   | log <sub>2</sub> FC | FDR          | log <sub>2</sub> FC | FDR          | log <sub>2</sub> FC | FDR   |
| PA14_00640     | <i>phzH</i>  | 1.0                 | 0.114 | 0.9                 | 0.210 | -0.1                | 0.883 | 0.1                 | 0.951        | 1.2                 | 0.371        | 1.0                 | 0.328 |
| PA14_09400     | <i>phzS</i>  | 0.2                 | 0.882 | 0.1                 | 0.955 | -0.1                | 0.952 | <b>4.0</b>          | <b>0.021</b> | <b>4.2</b>          | 0.008        | 0.2                 | 0.936 |
| PA14_09410     | <i>phzG1</i> | 0.4                 | 0.708 | 0.0                 | 0.994 | -0.4                | 0.768 | 3.1                 | 0.061        | <b>3.9</b>          | <b>0.010</b> | 0.7                 | 0.714 |
| PA14_09420     | <i>phzF1</i> | 0.1                 | 0.964 | -0.1                | 0.932 | -0.2                | 0.909 | 3.3                 | 0.056        | <b>4.1</b>          | 0.009        | 0.7                 | 0.717 |
| PA14_09440     | <i>phzE1</i> | 0.4                 | 0.715 | 0.3                 | 0.801 | -0.1                | 0.953 | 3.1                 | 0.059        | <b>4.0</b>          | 0.006        | 0.9                 | 0.598 |
| PA14_09450     | <i>phzD1</i> | -0.5                | 0.689 | 0.2                 | 0.907 | 0.6                 | 0.663 | <b>4.1</b>          | <b>0.021</b> | <b>5.1</b>          | 0.002        | 1.0                 | 0.624 |
| PA14_09460     | <i>phzC1</i> | 0.2                 | 0.863 | 0.2                 | 0.907 | -0.1                | 0.977 | <b>4.5</b>          | <b>0.014</b> | <b>5.3</b>          | 0.002        | 0.8                 | 0.720 |
| PA14_09470     | <i>phzB1</i> | 0.6                 | 0.668 | -0.6                | 0.689 | -1.1                | 0.464 | <b>4.0</b>          | <b>0.046</b> | <b>5.3</b>          | 0.004        | 1.4                 | 0.496 |
| PA14_09480     | <i>phzA1</i> | 0.6                 | 0.648 | -0.3                | 0.802 | -0.9                | 0.543 | 3.7                 | 0.054        | <b>5.2</b>          | 0.004        | 1.5                 | 0.446 |
| PA14_09490     | <i>phzM</i>  | 0.3                 | 0.737 | -0.1                | 0.927 | -0.4                | 0.727 | 2.3                 | 0.055        | <b>3.3</b>          | 0.002        | 1.0                 | 0.433 |
| PA14_39880     | <i>phzG2</i> | 0.4                 | 0.689 | 0.0                 | 0.994 | -0.4                | 0.769 | 3.2                 | 0.057        | <b>3.8</b>          | 0.012        | 0.6                 | 0.793 |
| PA14_39890     | <i>phzF2</i> | 0.1                 | 0.944 | -0.1                | 0.934 | -0.2                | 0.898 | 3.4                 | 0.055        | <b>4.1</b>          | 0.010        | 0.7                 | 0.743 |
| PA14_39910     | <i>phzE2</i> | 0.3                 | 0.781 | 0.2                 | 0.865 | -0.1                | 0.956 | 3.1                 | 0.058        | <b>4.0</b>          | 0.007        | 0.9                 | 0.632 |
| PA14_39925     | <i>phzD2</i> | -0.5                | 0.662 | 0.1                 | 0.958 | 0.6                 | 0.687 | <b>3.9</b>          | <b>0.029</b> | <b>4.6</b>          | 0.006        | 0.7                 | 0.773 |
| PA14_39945     | <i>phzC2</i> | 0.2                 | 0.897 | 0.3                 | 0.805 | 0.2                 | 0.919 | <b>4.0</b>          | <b>0.018</b> | <b>4.9</b>          | 0.002        | 0.9                 | 0.657 |
| PA14_39960     | <i>phzB2</i> | 0.8                 | 0.399 | 0.6                 | 0.553 | -0.2                | 0.897 | <b>3.0</b>          | <b>0.034</b> | <b>4.0</b>          | 0.002        | 1.0                 | 0.505 |
| PA14_39970     | <i>phzA2</i> | 0.8                 | 0.437 | 0.1                 | 0.918 | -0.7                | 0.613 | <b>3.3</b>          | <b>0.043</b> | <b>4.7</b>          | 0.002        | 1.3                 | 0.452 |

**Supplementary Table 3: Expression of T3SS-related genes**

Cluster-wise comparison of the expression of type III secretion system (T3SS)-related genes in biofilm (BF) or planktonic (PL) growth conditions. Significant changes (FDR < 0.05) are depicted in black; log<sub>2</sub>-fold changes (log<sub>2</sub>FC) above or below the threshold (±1.5) are displayed in bold.

| PA14 locus tag | Gene        | biofilm growth      |       |                     |       |                     |       | planktonic growth   |       |                     |       |                     |       |
|----------------|-------------|---------------------|-------|---------------------|-------|---------------------|-------|---------------------|-------|---------------------|-------|---------------------|-------|
|                |             | A vs. B             |       | A vs. C             |       | B vs. C             |       | A vs. B             |       | A vs. C             |       | B vs. C             |       |
|                |             | log <sub>2</sub> FC | FDR   | log <sub>2</sub> FC | FDR   | log <sub>2</sub> FC | FDR   | log <sub>2</sub> FC | FDR   | log <sub>2</sub> FC | FDR   | log <sub>2</sub> FC | FDR   |
| PA14_00560     | <i>exoT</i> | 1.0                 | 0.182 | <b>-2.0</b>         | 0.022 | <b>-3.0</b>         | 0.003 | 0.8                 | 0.697 | -1.7                | 0.187 | <b>-2.5</b>         | 0.033 |
| PA14_14330     | -           | 1.2                 | 0.129 | -0.4                | 0.659 | -1.6                | 0.102 | 1.1                 | 0.523 | -0.8                | 0.659 | -2.0                | 0.119 |
| PA14_36345     | <i>exoY</i> | 2.2                 | 0.051 | -1.0                | 0.404 | <b>-3.3</b>         | 0.029 | 0.0                 | 0.997 | -2.2                | 0.294 | -2.2                | 0.232 |
| PA14_42250     | <i>pscL</i> | 1.4                 | 0.008 | -0.4                | 0.470 | <b>-1.9</b>         | 0.006 | 0.6                 | 0.686 | -0.7                | 0.579 | -1.3                | 0.148 |
| PA14_42260     | <i>pscK</i> | 1.5                 | 0.006 | -0.4                | 0.483 | <b>-1.9</b>         | 0.005 | 0.6                 | 0.646 | -0.6                | 0.659 | -1.2                | 0.164 |
| PA14_42270     | <i>pscJ</i> | <b>1.9</b>          | 0.001 | -0.3                | 0.671 | <b>-2.2</b>         | 0.002 | 0.5                 | 0.734 | -0.9                | 0.427 | -1.4                | 0.107 |
| PA14_42280     | <i>pscI</i> | 0.8                 | 0.177 | -1.2                | 0.090 | <b>-2.0</b>         | 0.012 | 0.7                 | 0.695 | -0.8                | 0.598 | -1.4                | 0.161 |
| PA14_42290     | <i>pscH</i> | 1.3                 | 0.053 | -0.8                | 0.271 | <b>-2.0</b>         | 0.014 | 1.1                 | 0.438 | -0.5                | 0.754 | -1.6                | 0.136 |
| PA14_42300     | <i>pscG</i> | 0.5                 | 0.535 | <b>-1.7</b>         | 0.043 | <b>-2.2</b>         | 0.021 | 1.0                 | 0.596 | -0.9                | 0.588 | -1.9                | 0.114 |
| PA14_42310     | <i>pscF</i> | 1.1                 | 0.164 | -1.1                | 0.187 | <b>-2.1</b>         | 0.027 | 1.2                 | 0.486 | -1.1                | 0.505 | -2.3                | 0.056 |
| PA14_42320     | <i>pscE</i> | -0.7                | 0.454 | <b>-3.5</b>         | 0.004 | <b>-2.8</b>         | 0.021 | 1.5                 | 0.420 | -0.5                | 0.846 | -2.1                | 0.174 |
| PA14_42340     | <i>pscD</i> | 0.7                 | 0.438 | <b>-2.0</b>         | 0.043 | <b>-2.7</b>         | 0.017 | 1.5                 | 0.391 | -0.4                | 0.870 | -1.9                | 0.171 |
| PA14_42350     | <i>pscC</i> | 1.4                 | 0.039 | -0.9                | 0.216 | <b>-2.3</b>         | 0.009 | 0.7                 | 0.700 | -1.0                | 0.504 | -1.7                | 0.125 |
| PA14_42360     | <i>pscB</i> | 1.4                 | 0.051 | -0.8                | 0.313 | <b>-2.2</b>         | 0.018 | 0.9                 | 0.646 | -0.8                | 0.655 | -1.6                | 0.167 |
| PA14_42380     | <i>exsD</i> | 0.1                 | 0.853 | <b>-2.3</b>         | 0.005 | <b>-2.5</b>         | 0.004 | 0.9                 | 0.563 | -0.7                | 0.667 | -1.6                | 0.138 |
| PA14_42390     | <i>exsA</i> | 0.3                 | 0.698 | -1.0                | 0.133 | -1.3                | 0.096 | 0.8                 | 0.602 | -0.6                | 0.698 | -1.4                | 0.167 |
| PA14_42400     | <i>exsB</i> | 0.3                 | 0.719 | <b>-2.1</b>         | 0.016 | <b>-2.4</b>         | 0.013 | 0.3                 | 0.882 | -0.9                | 0.606 | -1.2                | 0.296 |
| PA14_42410     | -           | -1.1                | 0.203 | <b>-3.6</b>         | 0.002 | <b>-2.5</b>         | 0.022 | 0.4                 | 0.891 | -1.0                | 0.608 | -1.4                | 0.309 |
| PA14_42430     | <i>exsC</i> | -0.9                | 0.218 | <b>-3.4</b>         | 0.002 | <b>-2.5</b>         | 0.009 | 0.7                 | 0.714 | -0.7                | 0.688 | -1.4                | 0.226 |
| PA14_42440     | <i>popD</i> | 0.6                 | 0.513 | <b>-3.6</b>         | 0.004 | <b>-4.2</b>         | 0.002 | 1.3                 | 0.591 | -1.6                | 0.403 | -2.9                | 0.058 |
| PA14_42450     | <i>popB</i> | 0.3                 | 0.781 | <b>-3.7</b>         | 0.005 | <b>-4.0</b>         | 0.004 | 1.3                 | 0.612 | -1.8                | 0.375 | -3.1                | 0.058 |
| PA14_42460     | <i>pcrH</i> | 0.0                 | 0.968 | <b>-3.7</b>         | 0.004 | <b>-3.7</b>         | 0.005 | 1.1                 | 0.675 | -1.0                | 0.673 | -2.1                | 0.194 |
| PA14_42470     | <i>pcrV</i> | 1.0                 | 0.228 | <b>-2.4</b>         | 0.017 | <b>-3.4</b>         | 0.003 | 1.0                 | 0.663 | -1.4                | 0.429 | -2.4                | 0.081 |
| PA14_42480     | <i>pcrG</i> | 0.8                 | 0.397 | <b>-3.7</b>         | 0.003 | <b>-4.5</b>         | 0.002 | 1.4                 | 0.535 | -1.1                | 0.606 | -2.5                | 0.107 |
| PA14_42490     | <i>pcrR</i> | 0.8                 | 0.195 | -1.5                | 0.043 | <b>-2.3</b>         | 0.006 | 0.5                 | 0.775 | -0.3                | 0.860 | -0.9                | 0.400 |
| PA14_42500     | <i>pcrD</i> | 1.4                 | 0.017 | -0.4                | 0.500 | <b>-1.8</b>         | 0.013 | 0.4                 | 0.821 | -0.8                | 0.503 | -1.2                | 0.193 |
| PA14_42510     | <i>pcr4</i> | <b>1.6</b>          | 0.040 | -0.3                | 0.725 | <b>-1.9</b>         | 0.050 | 0.0                 | 0.994 | -0.9                | 0.640 | -0.8                | 0.516 |
| PA14_42520     | <i>pcr3</i> | 0.8                 | 0.327 | -1.3                | 0.157 | <b>-2.1</b>         | 0.047 | 0.4                 | 0.881 | -1.1                | 0.540 | -1.5                | 0.252 |
| PA14_42530     | <i>pcr2</i> | 1.3                 | 0.116 | -1.3                | 0.150 | <b>-2.5</b>         | 0.016 | 0.2                 | 0.944 | -0.9                | 0.619 | -1.1                | 0.383 |
| PA14_42540     | <i>pcr1</i> | <b>1.6</b>          | 0.039 | -0.6                | 0.508 | <b>-2.2</b>         | 0.028 | 0.1                 | 0.979 | -1.7                | 0.196 | -1.8                | 0.170 |
| PA14_42550     | <i>popN</i> | 0.5                 | 0.563 | -1.2                | 0.186 | -1.7                | 0.102 | 0.4                 | 0.864 | -1.0                | 0.610 | -1.5                | 0.288 |
| PA14_42570     | <i>pscN</i> | 1.6                 | 0.051 | -0.7                | 0.460 | <b>-2.3</b>         | 0.030 | 0.6                 | 0.800 | -1.4                | 0.383 | -2.0                | 0.136 |
| PA14_42580     | <i>pscO</i> | 1.4                 | 0.105 | -1.3                | 0.157 | <b>-2.7</b>         | 0.016 | 0.4                 | 0.893 | -1.1                | 0.567 | -1.5                | 0.283 |
| PA14_42600     | <i>pscP</i> | <b>2.8</b>          | 0.001 | -0.1                | 0.930 | <b>-2.9</b>         | 0.004 | 0.8                 | 0.695 | -0.6                | 0.770 | -1.4                | 0.253 |
| PA14_42610     | <i>pscQ</i> | 1.5                 | 0.062 | -0.5                | 0.622 | -2.0                | 0.053 | 1.0                 | 0.619 | -0.9                | 0.654 | -1.9                | 0.154 |
| PA14_42620     | <i>pscR</i> | <b>2.1</b>          | 0.004 | 0.3                 | 0.707 | <b>-1.8</b>         | 0.045 | 0.8                 | 0.674 | -0.6                | 0.737 | -1.4                | 0.220 |
| PA14_42630     | <i>pscS</i> | <b>2.3</b>          | 0.001 | 0.4                 | 0.633 | <b>-1.9</b>         | 0.021 | 0.8                 | 0.626 | -0.7                | 0.681 | -1.5                | 0.167 |
| PA14_42640     | <i>pscT</i> | <b>2.0</b>          | 0.004 | 0.4                 | 0.597 | -1.6                | 0.055 | 0.1                 | 0.985 | -0.5                | 0.770 | -0.6                | 0.637 |
| PA14_42660     | <i>pscU</i> | <b>2.8</b>          | 0.000 | 0.9                 | 0.165 | <b>-1.9</b>         | 0.013 | 0.2                 | 0.929 | -0.5                | 0.749 | -0.7                | 0.511 |
| PA14_51520     | <i>spcU</i> | 0.0                 | 0.994 | -4.4                | 0.090 | <b>-4.4</b>         | 0.133 | 0.3                 | 0.975 | -0.7                | 0.914 | -1.0                | 0.819 |
| PA14_51530     | <i>exoU</i> | 1.0                 | 0.678 | -3.9                | 0.135 | -4.9                | 0.119 | 1.8                 | 0.782 | -0.8                | 0.908 | -2.6                | 0.504 |
| PA14_00560     | <i>exoT</i> | 1.0                 | 0.182 | <b>-2.0</b>         | 0.022 | <b>-3.0</b>         | 0.003 | 0.8                 | 0.697 | -1.7                | 0.187 | <b>-2.5</b>         | 0.033 |
| PA14_14330     | -           | 1.2                 | 0.129 | -0.4                | 0.659 | -1.6                | 0.102 | 1.1                 | 0.523 | -0.8                | 0.659 | -2.0                | 0.119 |
| PA14_36345     | <i>exoY</i> | 2.2                 | 0.051 | -1.0                | 0.404 | <b>-3.3</b>         | 0.029 | 0.0                 | 0.997 | -2.2                | 0.294 | -2.2                | 0.232 |
| PA14_42250     | <i>pscL</i> | 1.4                 | 0.008 | -0.4                | 0.470 | <b>-1.9</b>         | 0.006 | 0.6                 | 0.686 | -0.7                | 0.579 | -1.3                | 0.148 |
| PA14_42260     | <i>pscK</i> | 1.5                 | 0.006 | -0.4                | 0.483 | <b>-1.9</b>         | 0.005 | 0.6                 | 0.646 | -0.6                | 0.659 | -1.2                | 0.164 |
| PA14_42270     | <i>pscJ</i> | <b>1.9</b>          | 0.001 | -0.3                | 0.671 | <b>-2.2</b>         | 0.002 | 0.5                 | 0.734 | -0.9                | 0.427 | -1.4                | 0.107 |
| PA14_42280     | <i>pscI</i> | 0.8                 | 0.177 | -1.2                | 0.090 | <b>-2.0</b>         | 0.012 | 0.7                 | 0.695 | -0.8                | 0.598 | -1.4                | 0.161 |
| PA14_42290     | <i>pscH</i> | 1.3                 | 0.053 | -0.8                | 0.271 | <b>-2.0</b>         | 0.014 | 1.1                 | 0.438 | -0.5                | 0.754 | -1.6                | 0.136 |
| PA14_42300     | <i>pscG</i> | 0.5                 | 0.535 | <b>-1.7</b>         | 0.043 | <b>-2.2</b>         | 0.021 | 1.0                 | 0.596 | -0.9                | 0.588 | -1.9                | 0.114 |
| PA14_42310     | <i>pscF</i> | 1.1                 | 0.164 | -1.1                | 0.187 | <b>-2.1</b>         | 0.027 | 1.2                 | 0.486 | -1.1                | 0.505 | -2.3                | 0.056 |

**Supplementary Table 4: Phenotypic characterization of 33 selected clinical isolates**

Colony size: 0 – SCV to 3 – large; Margin: 0 – no spreading to 2 – strong spreading of the colony; Surface: 0 – rough, 1 – smooth and shiny; metallic sheen: 0 – none to 2 – clearly visible throughout the bacterial lawn; Hemolysis: 0 – none to 2 – enhanced; growth iron limitation: 1 – growth, 2 – no growth.

| Isolate      | Biofilm cluster | PA14 - PAO1 like | Colony size | Margin | Surface | Metallic sheen | Hemolysis | Growth under iron-limitation | Biofilm biomass [OD <sub>540</sub> ] | c-di-GMP [pmol/mg protein] | Virulence in <i>G. mellonella</i> [% killing] | Cytotoxicity [%] | Pyocyanin [µg/ml] | rel. Elastase secretion 24 h planktonic | rel. Elastase secretion 48 h biofilm | rel. Protease production | Swimming zone [cm <sup>2</sup> ] | Twitching area [cm <sup>2</sup> ] | Swarming area [cm <sup>2</sup> ] | H <sub>2</sub> O <sub>2</sub> diameter inhibition zone [mm] |
|--------------|-----------------|------------------|-------------|--------|---------|----------------|-----------|------------------------------|--------------------------------------|----------------------------|-----------------------------------------------|------------------|-------------------|-----------------------------------------|--------------------------------------|--------------------------|----------------------------------|-----------------------------------|----------------------------------|-------------------------------------------------------------|
| CH2860       | A               | PAO1             | 3           | 1      | 1       | 0              | 2         | 1                            | 0.36                                 | 1.70                       | 95%                                           | 35%              | 5.46              | 1.00                                    | 0.85                                 | 0.29                     | 0.98                             | 4.51                              | 0.46                             | 16.56                                                       |
| CH4528       | A               | PAO1             | 2           | 1      | 0       | 2              | 1         | 1                            | 0.76                                 | 3.37                       | 100%                                          | 31%              | 7.22              | 0.49                                    | 0.53                                 | 0.27                     | 0.40                             | 4.47                              | 0.00                             | 19.33                                                       |
| ESP046       | A               | PAO1             | 2           | 2      | 1       | 0              | 2         | 1                            | 0.42                                 | 2.39                       | 100%                                          | 34%              | 2.95              | 0.88                                    | 0.77                                 | 0.34                     | 0.51                             | 2.90                              | 2.36                             | 15.67                                                       |
| ESP067       | A               | PAO1             | 1           | 2      | 0       | 2              | 2         | 1                            | 0.49                                 | 2.82                       | 95%                                           | 45%              | 3.07              | 0.84                                    | 1.00                                 | 0.47                     | 1.90                             | 2.25                              | 6.21                             | 16.33                                                       |
| ESP088       | A               | PAO1             | 2           | 1      | 1       | 0              | 2         | 1                            | 0.56                                 | 2.79                       | 95%                                           | 34%              | 0.00              | 0.06                                    | 0.12                                 | 0.12                     | 0.41                             | 2.12                              | 0.00                             | 17.67                                                       |
| F2030        | A               | PA14             | 2           | 1      | 0       | 1              | 2         | 1                            | 1.92                                 | 5.85                       | 100%                                          | 0%               | 0.09              | 0.42                                    | 0.67                                 | 0.80                     | 0.58                             | 0.53                              | 0.00                             | 19.17                                                       |
| F2137        | A               | PAO1             | 2           | 1      | 0       | 2              | 1         | 1                            | 0.17                                 | 9.19                       | 80%                                           | 63%              | 0.60              | 0.02                                    | 0.79                                 | 0.00                     | 0.28                             | 2.08                              | 0.00                             | 17.50                                                       |
| MHH16798     | A               | PAO1             | 2           | 1      | 1       | 0              | 2         | 1                            | 0.47                                 | 3.87                       | 80%                                           | 36%              | 1.03              | 0.84                                    | 0.98                                 | 0.27                     | 0.69                             | 1.71                              | 0.31                             | 17.17                                                       |
| MHH17704     | A               | PAO1             | #NA         | #NA    | #NA     | #NA            | #NA       | 1                            | 0.95                                 | 3.14                       | 95%                                           | 22%              | 0.07              | 0.54                                    | 0.67                                 | 0.32                     | 1.02                             | 4.66                              | 0.28                             | 18.50                                                       |
| ZG302383     | A               | PAO1             | 2           | 1      | 1       | 0              | 2         | 1                            | 0.81                                 | 5.90                       | 100%                                          | 60%              | 2.09              | 0.70                                    | 0.79                                 | 0.38                     | 1.01                             | 1.49                              | 2.66                             | 19.61                                                       |
| ZG8038581181 | A               | PAO1             | 2           | 1      | 1       | 0              | 2         | 1                            | 0.59                                 | 2.23                       | 90%                                           | 31%              | 1.29              | 0.97                                    | 0.97                                 | 0.66                     | 0.87                             | 1.42                              | 16.01                            | 17.67                                                       |
| CH2682       | B               | PAO1             | 3           | 0      | 1       | 0              | 2         | 0                            | 0.54                                 | 4.68                       | 5%                                            | 7%               | 0.05              | #NA                                     | #NA                                  | 0.20                     | 0.00                             | 1.11                              | 0.36                             | 17.17                                                       |
| ESP027       | B               | PAO1             | 0           | 0      | 0       | 1              | 0         | 0                            | 0.73                                 | 2.91                       | 0%                                            | 3%               | 0.21              | 0.27                                    | 0.20                                 | 0.00                     | 0.68                             | 0.30                              | 0.00                             | 18.00                                                       |
| F1959        | B               | PAO1             | 0           | 0      | 0       | 0              | 0         | 0                            | 0.01                                 | 93.66                      | 0%                                            | 13%              | 0.07              | 0.68                                    | 0.00                                 | 0.26                     | 0.00                             | 0.00                              | 0.00                             | 8.61                                                        |
| F2020        | B               | PA14             | 3           | 0      | 0       | 1              | 1         | 1                            | 0.09                                 | 7.27                       | 5%                                            | 0%               | 0.08              | 0.01                                    | 0.03                                 | 0.05                     | 0.69                             | 0.15                              | 0.00                             | 13.33                                                       |
| F2165        | B               | PAO1             | 2           | 0      | 0       | 2              | 1         | 1                            | 0.13                                 | 11.93                      | 0%                                            | 5%               | 0.37              | 0.03                                    | 0.54                                 | 0.00                     | 0.19                             | 1.62                              | 0.00                             | 17.17                                                       |
| F2166        | B               | PAO1             | 3           | 0      | 0       | 2              | 1         | 1                            | 0.12                                 | 13.36                      | 0%                                            | 5%               | 1.77              | 0.03                                    | 0.54                                 | 0.00                     | 0.24                             | 1.11                              | 0.00                             | 16.83                                                       |
| F2224        | B               | PAO1             | 2           | 0      | 1       | 0              | 1         | 1                            | 1.01                                 | 22.11                      | 5%                                            | 27%              | 0.15              | 0.05                                    | 0.11                                 | 0.19                     | 0.29                             | 0.70                              | 0.00                             | 16.17                                                       |
| MHH16050     | B               | PAO1             | 1           | 0      | 0       | 1              | 1         | 1                            | 0.01                                 | 2.75                       | 40%                                           | 1%               | 0.14              | 0.03                                    | 0.00                                 | 0.00                     | 0.00                             | 0.57                              | 0.00                             | 18.33                                                       |
| MHH16563     | B               | PA14             | 1           | 1      | 1       | 0              | 1         | 1                            | 1.70                                 | 63.67                      | 5%                                            | 27%              | 0.03              | 0.15                                    | 0.35                                 | 0.47                     | 0.27                             | 1.94                              | 0.00                             | 17.00                                                       |
| MHH17767     | B               | PAO1             | 0           | 0      | 0       | 1              | 0         | 1                            | 0.58                                 | 2.42                       | 0%                                            | 41%              | 1.73              | 0.06                                    | 0.69                                 | 0.00                     | 0.10                             | 0.37                              | 0.00                             | 10.67                                                       |
| CH2706       | C               | PAO1             | 2           | 1      | 0       | 1              | 1         | 1                            | 1.65                                 | 4.00                       | 100%                                          | 50%              | 1.27              | 0.36                                    | 0.06                                 | 0.15                     | 0.17                             | 2.92                              | 0.21                             | 14.33                                                       |
| CH4591       | C               | PAO1             | 2           | 0      | 0       | 1              | 1         | 1                            | 0.72                                 | 3.63                       | 100%                                          | 47%              | 0.40              | 0.70                                    | 0.63                                 | 0.42                     | 1.52                             | 2.18                              | 0.00                             | 14.00                                                       |
| CH4634       | C               | PA14             | 2           | 0      | 1       | 0              | 1         | 1                            | 0.70                                 | 2.96                       | 100%                                          | 25%              | 1.58              | 0.74                                    | 0.80                                 | 0.72                     | 0.56                             | 4.01                              | 9.91                             | 17.83                                                       |
| ESP063       | C               | PAO1             | 2           | 1      | 0       | 2              | 1         | 1                            | 0.30                                 | 1.76                       | 100%                                          | 53%              | 0.00              | 0.01                                    | 0.06                                 | 0.06                     | 0.24                             | 3.40                              | 0.00                             | 19.67                                                       |
| ESP083       | C               | PAO1             | 2           | 1      | 0       | 2              | 1         | 1                            | 0.34                                 | 4.01                       | 100%                                          | 54%              | 0.03              | 0.01                                    | 0.03                                 | 0.00                     | 0.40                             | 2.85                              | 0.00                             | 17.67                                                       |
| F1864        | C               | PA14             | 2           | 1      | 0       | 2              | 1         | 1                            | 0.80                                 | 2.77                       | 100%                                          | 51%              | 0.02              | 0.01                                    | 0.13                                 | 0.10                     | 0.15                             | 2.37                              | 0.00                             | 19.25                                                       |
| F2006        | C               | PAO1             | 1           | 0      | 0       | 1              | 1         | 1                            | 1.43                                 | 12.65                      | 15%                                           | 52%              | 2.21              | 0.03                                    | 0.40                                 | 0.00                     | 0.32                             | 1.03                              | 0.20                             | 20.92                                                       |
| F2059        | C               | PAO1             | 2           | 1      | 0       | 2              | 1         | 1                            | 1.18                                 | 7.17                       | 100%                                          | 50%              | 0.11              | 0.01                                    | 0.05                                 | 0.16                     | 0.85                             | 0.00                              | 0.00                             | 18.42                                                       |
| F2856        | C               | PAO1             | 1           | 1      | 0       | 2              | 1         | 1                            | 0.62                                 | 3.53                       | 35%                                           | 43%              | 0.13              | 0.01                                    | 0.02                                 | 0.24                     | 0.90                             | 3.16                              | 0.00                             | 18.00                                                       |
| Psae1656     | C               | PA14             | 2           | 1      | 0       | 2              | 1         | 1                            | 2.76                                 | 6.37                       | 70%                                           | 44%              | 0.08              | 0.01                                    | 0.02                                 | 0.00                     | 0.00                             | 1.87                              | 0.00                             | 17.75                                                       |
| ZG316717     | C               | PA14             | 0           | 0      | 0       | 1              | 1         | 0                            | 2.42                                 | 3.51                       | 95%                                           | 47%              | 0.12              | 0.01                                    | 0.05                                 | 0.00                     | 0.35                             | 0.61                              | 0.00                             | 19.83                                                       |
| ZG8510487    | C               | PAO1             | 1           | 1      | 0       | 2              | 1         | 1                            | 2.17                                 | 2.93                       | 100%                                          | 32%              | 1.01              | 0.28                                    | 0.98                                 | 0.31                     | 0.00                             | 0.12                              | 0.00                             | 18.17                                                       |

## **Description of additional electronic Supplementary Data**

### **Supplementary Data 1:**

Differential gene expression analysis under biofilm (BF) versus planktonic (PL) growth conditions for 77 diverse clinical isolates (all 77 isolates) and for three major structurally distinct biofilm clusters (cluster A, cluster B, cluster C).

### **Supplementary Data 2:**

Cluster-wise comparison of gene expression for transcriptional profiles in biofilm (BF) or planktonic (PL) growth conditions.
